# Supplementary material for: Association of serum 25-hydroxyvitamin D with bone health measured by calcaneal quantitative ultrasound: a large cross-sectional analysis in children and adolescents
Source: Royal Society of Chemistry journal article supplement (doi:10.1039/d3fo04811j), 2023-12-18
Supplement: d3fo04811j1.pdf [file d3fo04811j1.pdf]

**Association of serum 25-hydroxyvitamin D with bone health measured by calcaneal quantitative ultrasound: a large cross-sectional analysis in children and adolescents**

**Supplementary online content**

**Supplemental Figure 1.** Flow of participants in current study.

**Supplemental Figure 2.** The association between serum 25-hydroxyvitamin D levels and SOS Z score stratified by age (A), gender (B), stage of puberty (C), and weight status (D).

**Supplemental Table 1.** Baseline characteristics of 4682 participants by quartiles of serum 25-hydroxyvitamin D3.

**Supplemental Table 2.** Stratified analyses of potential modification effect for the association between serum 25-hydroxyvitamin D and SOS Z score.

**Supplemental Table 3.** Association between serum vitamin D status and SOS (SOS Z score).

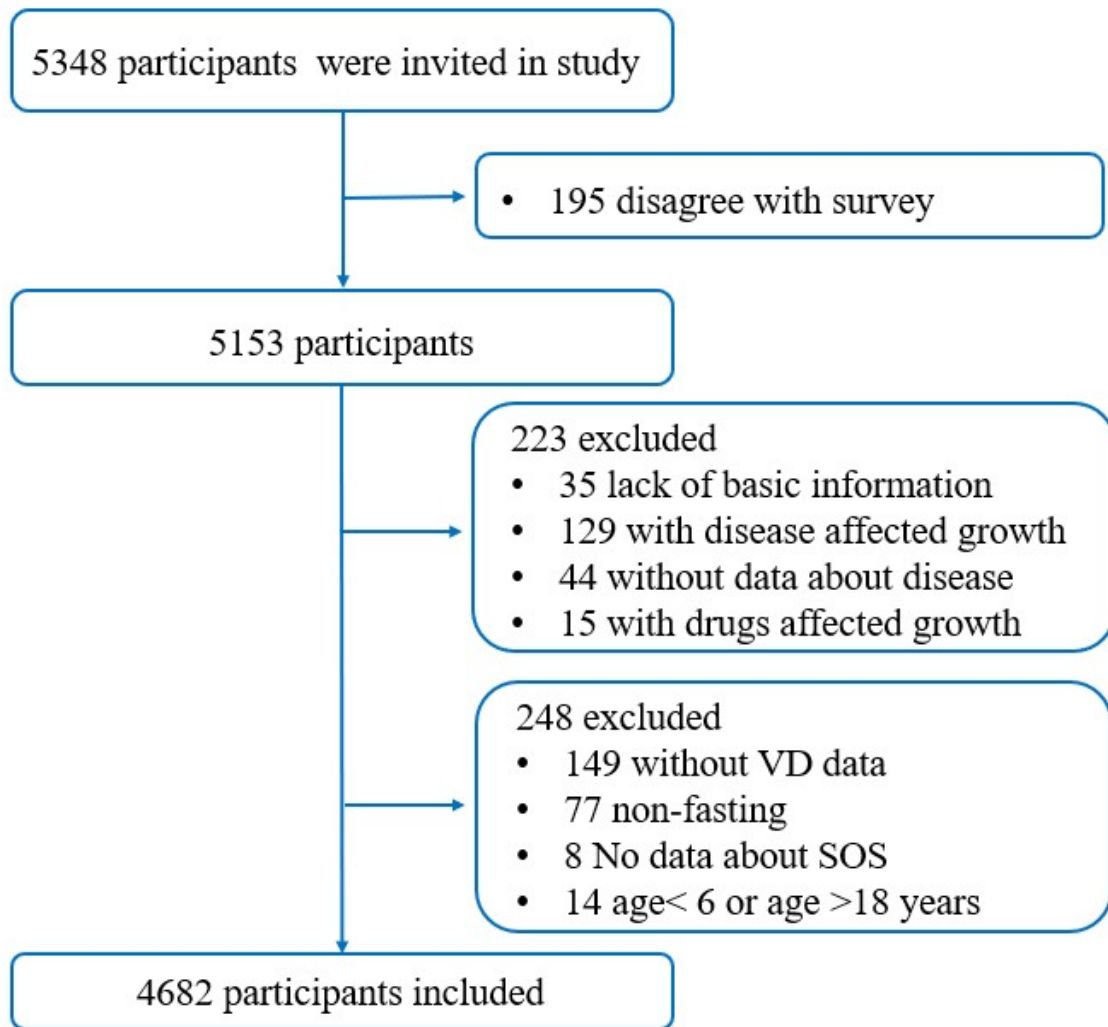

**Supplemental Figure 1. Flow of participants in current study**

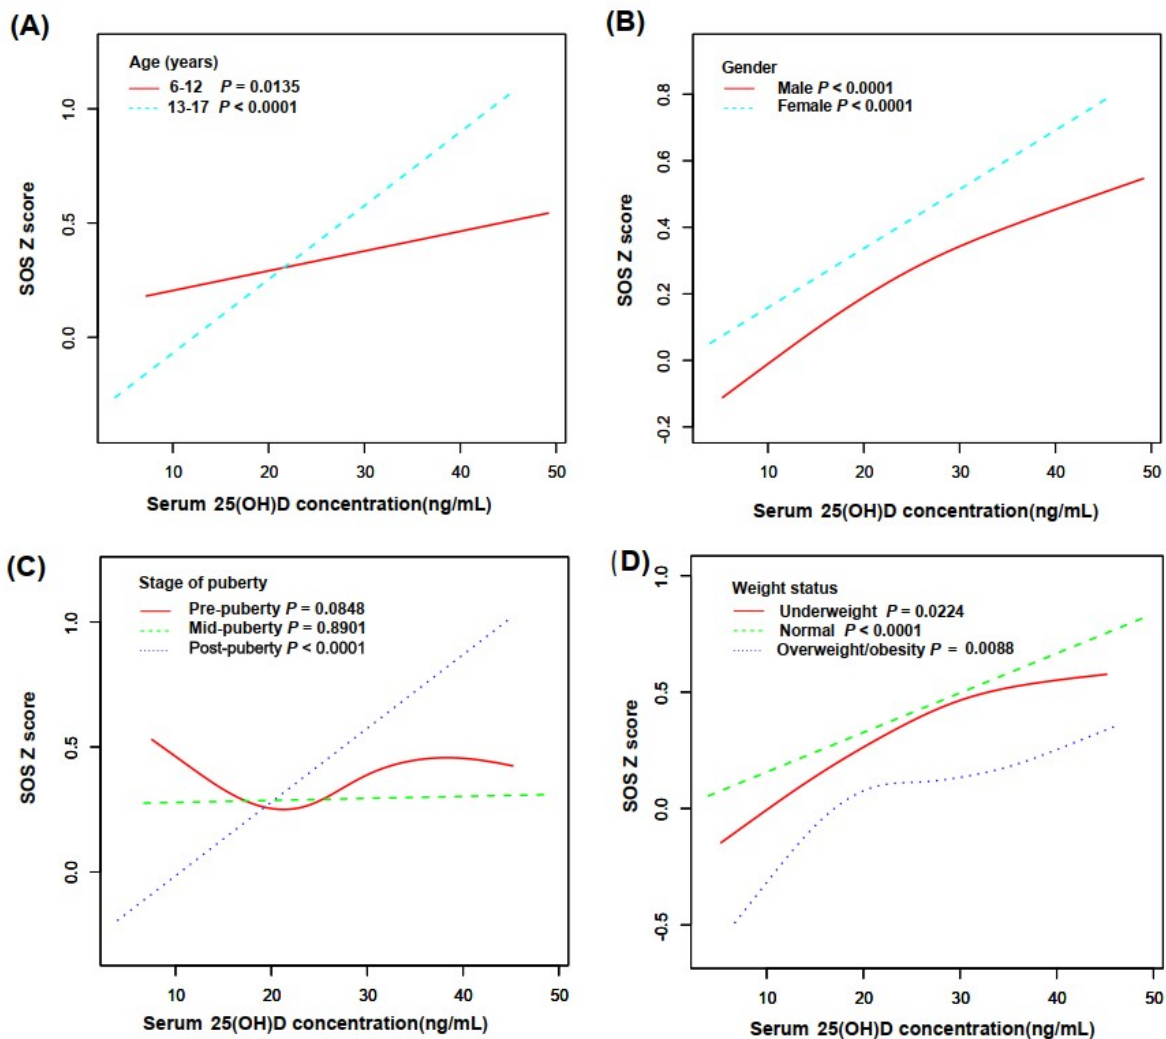

**Supplemental Figure 2. The association between serum 25-hydroxyvitamin D levels and SOS Z score stratified by age (A), gender (B), stage of puberty (C), and weight status (D).** Spline smoothing, based on a generalized additive model, was used, the models were adjusted as followed: age, gender, paternal education levels, maternal education levels, household income, pubertal development stages, weight status, sedentary behaviour, nighttime sleep duration, nap duration, levels of MVPA, drinking status, smoking status, vitamin D supplement, calcium supplement, and multivitamin mineral supplement. Analyses that stratified by age (6-12 or 13-18years), gender (male or female), stage of puberty (pre-, mid-, or post-puberty), and weight status (underweight, normal weight, or overweight/obesity), each of the else groups were adjusted for all covariates expect itself.

**Supplemental Table 1. Baseline characteristics of 4682 participants by quartiles of serum 25-hydroxyvitamin D<sub>3</sub>.**

| Variables                                     | Q1               | Q2               | Q3               | Q4               | P      |
|-----------------------------------------------|------------------|------------------|------------------|------------------|--------|
| <b>N</b>                                      | 1170             | 1170             | 1172             | 1170             |        |
| <b>Age, years</b>                             | 14.7 (12.4-16.2) | 12.6 (10.2-14.8) | 10.9 (8.8-13.4)  | 9.4 (7.9-12.0)   | <0.001 |
| <b>Gender (female), n (%)</b>                 | 695 (59.4%)      | 534 (45.6%)      | 453 (38.7%)      | 413 (35.3%)      | <0.001 |
| <b>Stage of puberty, n (%)</b>                |                  |                  |                  |                  | <0.001 |
| Pre-puberty                                   | 109 (9.3%)       | 267 (22.8%)      | 440 (37.5%)      | 638 (54.5%)      |        |
| Mid-puberty                                   | 168 (14.4%)      | 260 (22.2%)      | 335 (28.6%)      | 266 (22.7%)      |        |
| Post-puberty                                  | 893 (76.3%)      | 643 (55.0%)      | 397 (33.9%)      | 266 (22.7%)      |        |
| <b>BMI, kg/m<sup>2</sup></b>                  | 19.2 (17.2-21.7) | 18.6 (16.3-21.4) | 17.6 (15.4-20.4) | 16.8 (15.0-19.6) | <0.001 |
| <b>Weight status, n (%)</b>                   |                  |                  |                  |                  | 0.002  |
| Underweight                                   | 76 (6.5%)        | 97 (8.3%)        | 114 (9.7%)       | 123 (10.5%)      |        |
| Normal weight                                 | 860 (73.5%)      | 790 (67.5%)      | 781 (66.6%)      | 770 (65.8%)      |        |
| Overweight                                    | 143 (12.2%)      | 165 (14.1%)      | 157 (13.4%)      | 170 (14.5%)      |        |
| Obesity                                       | 91 (7.8%)        | 118 (10.1%)      | 120 (10.2%)      | 107 (9.1%)       |        |
| <b>Sedentary behaviour, hour/d</b>            | 9.6 (7.7-11.4)   | 8.2 (6.9-10.1)   | 7.6 (6.4-9.2)    | 7.1 (5.9-8.8)    | <0.001 |
| <b>nighttime sleep duration, hour/d</b>       | 8.0 (7.4-8.7)    | 8.5 (7.9-9.2)    | 8.8 (8.1-9.3)    | 9.0 (8.3-9.4)    | <0.001 |
| <b>Nap duration, hour/d</b>                   | 0.6 (0.4-0.9)    | 0.7 (0.4-1.0)    | 0.6 (0.4-1.0)    | 0.7 (0.4-1.0)    | 0.23   |
| <b>Levels of MVPA, n (%)</b>                  |                  |                  |                  |                  | <0.001 |
| <0.5hour/d                                    | 419 (35.8%)      | 305 (26.1%)      | 281 (24.0%)      | 296 (25.3%)      |        |
| ~1hour/d                                      | 527 (45.0%)      | 530 (45.3%)      | 540 (46.1%)      | 530 (45.3%)      |        |
| ~3hour/d                                      | 185 (15.8%)      | 291 (24.9%)      | 293 (25.0%)      | 290 (24.8%)      |        |
| >3hour/d                                      | 31 (2.6%)        | 35 (3.0%)        | 47 (4.0%)        | 41 (3.5%)        |        |
| missing                                       | 8 (0.7%)         | 9 (0.8%)         | 11 (0.9%)        | 13 (1.1%)        |        |
| <b>Smoking status</b>                         |                  |                  |                  |                  | 0.578  |
| Never                                         | 1144 (97.8%)     | 1142 (97.6%)     | 1148 (98.0%)     | 1150 (98.3%)     |        |
| <1 cigarette/month                            | 11 (0.9%)        | 9 (0.8%)         | 5 (0.4%)         | 5 (0.4%)         |        |
| >= 1cigarette/month                           | 6 (0.5%)         | 6 (0.5%)         | 6 (0.5%)         | 3 (0.3%)         |        |
| e-cigarette                                   | 2 (0.2%)         | 2 (0.2%)         | 4 (0.3%)         | 0 (0.0%)         |        |
| Missing                                       | 7 (0.6%)         | 11 (0.9%)        | 9 (0.8%)         | 12 (1.0%)        |        |
| <b>Drinking status,</b>                       |                  |                  |                  |                  | <0.001 |
| Never                                         | 978 (83.6%)      | 1011 (86.4%)     | 1052 (89.8%)     | 1098 (93.8%)     |        |
| <1 standard drink/ month                      | 134 (11.5%)      | 126 (10.8%)      | 85 (7.3%)        | 56 (4.8%)        |        |
| >= 1 standard drink/ month                    | 52 (4.4%)        | 27 (2.3%)        | 28 (2.4%)        | 13 (1.1%)        |        |
| Missing                                       | 6 (0.5%)         | 6 (0.5%)         | 7 (0.6%)         | 3 (0.3%)         |        |
| <b>Vitamin D supplement, n (%)</b>            |                  |                  |                  |                  | <0.001 |
| No                                            | 1063 (90.9%)     | 1016 (86.8%)     | 979 (83.5%)      | 946 (80.9%)      |        |
| Yes                                           | 102 (8.7%)       | 153 (13.1%)      | 189 (16.1%)      | 222 (19.0%)      |        |
| Missing                                       | 5 (0.4%)         | 1 (0.1%)         | 4 (0.3%)         | 2 (0.2%)         |        |
| <b>Calcium supplement, n (%)</b>              |                  |                  |                  |                  | <0.001 |
| No                                            | 1029 (87.9%)     | 969 (82.8%)      | 935 (79.8%)      | 934 (79.8%)      |        |
| Yes                                           | 136 (11.6%)      | 200 (17.1%)      | 234 (20.0%)      | 234 (20.0%)      |        |
| Missing                                       | 5 (0.4%)         | 1 (0.1%)         | 3 (0.3%)         | 2 (0.2%)         |        |
| <b>Multivitamin mineral supplement, n (%)</b> |                  |                  |                  |                  | 0.669  |
| No                                            | 1072 (91.6%)     | 1058 (90.4%)     | 1054 (89.9%)     | 1059 (90.5%)     |        |
| Yes                                           | 89 (7.6%)        | 107 (9.1%)       | 111 (9.5%)       | 103 (8.8%)       |        |
| Missing                                       | 9 (0.8%)         | 5 (0.4%)         | 7 (0.6%)         | 8 (0.7%)         |        |
| <b>Household income, n (%)</b>                |                  |                  |                  |                  | <0.001 |
| <120,000 CNY/years                            | 367 (31.4%)      | 343 (29.3%)      | 276 (23.5%)      | 250 (21.4%)      |        |
| ~250,000 CNY/years                            | 387 (33.1%)      | 393 (33.6%)      | 409 (34.9%)      | 389 (33.2%)      |        |
| >=250,000 CNY/years                           | 404 (34.5%)      | 424 (36.2%)      | 479 (40.9%)      | 527 (45.0%)      |        |
| Missing                                       | 12 (1.0%)        | 10 (0.9%)        | 8 (0.7%)         | 4 (0.3%)         |        |

|                                        |                        |                        |                        |                        |        |
|----------------------------------------|------------------------|------------------------|------------------------|------------------------|--------|
| <b>Paternal education level, n (%)</b> |                        |                        |                        |                        | <0.001 |
| <=9 years                              | 266 (22.7%)            | 204 (17.4%)            | 154 (13.1%)            | 135 (11.5%)            |        |
| 10~12 years                            | 289 (24.7%)            | 286 (24.4%)            | 260 (22.2%)            | 219 (18.7%)            |        |
| 13~15 years                            | 324 (27.7%)            | 329 (28.1%)            | 317 (27.0%)            | 339 (29.0%)            |        |
| >=16 years                             | 277 (23.7%)            | 339 (29.0%)            | 434 (37.0%)            | 465 (39.7%)            |        |
| Missing                                | 14 (1.2%)              | 12 (1.0%)              | 7 (0.6%)               | 12 (1.0%)              |        |
| <b>Maternal education level, n (%)</b> |                        |                        |                        |                        | <0.001 |
| <=9 years                              | 313 (26.8%)            | 244 (20.9%)            | 199 (17.0%)            | 165 (14.1%)            |        |
| 10~12 years                            | 337 (28.8%)            | 324 (27.7%)            | 284 (24.2%)            | 270 (23.1%)            |        |
| 13~15 years                            | 276 (23.6%)            | 323 (27.6%)            | 355 (30.3%)            | 370 (31.6%)            |        |
| >=16 years                             | 230 (19.7%)            | 277 (23.7%)            | 329 (28.1%)            | 356 (30.4%)            |        |
| Missing                                | 14 (1.2%)              | 2 (0.2%)               | 5 (0.4%)               | 9 (0.8%)               |        |
| <b>25(OH)D, ng/mL</b>                  | 14.6 (12.5-16.1)       | 19.4 (18.3-20.4)       | 23.6 (22.4-24.7)       | 29.5 (27.5-32.2)       | <0.001 |
| <b>25(OH)D<sub>2</sub>, ng/mL</b>      | 0.4 (0.3-0.6)          | 0.4 (0.3-0.6)          | 0.4 (0.3-0.6)          | 0.4 (0.3-0.6)          | <0.001 |
| <b>25(OH)D<sub>3</sub>, ng/mL</b>      | 13.9 (11.9-15.5)       | 18.9 (17.8-19.8)       | 23.0 (22.0-24.1)       | 29.0 (27.0-31.7)       | <0.001 |
| <b>SOS, m/s</b>                        | 1550.0 (1532.0-1574.0) | 1551.0 (1532.0-1574.0) | 1551.0 (1533.0-1573.0) | 1555.0 (1534.0-1575.0) | 0.708  |
| <b>SOS Z score</b>                     | 0.0 (-0.6-0.8)         | 0.2 (-0.4-0.9)         | 0.3 (-0.3-0.9)         | 0.3 (-0.3-1.0)         | <0.001 |

Abbreviations: CNY, Chinese Yuan; MVPA, moderate to vigorous physical activity

**Supplemental Table 2. Stratified analyses of potential modification effect for the association between serum 25-hydroxyvitamin D and SOS Z score <sup>a</sup>.**

|                         | N    | Q1           | Q2                  | Q3                  | Q4                 | <i>P</i> trend <sup>b</sup> | Per 1SD increment  | <i>P</i> interaction <sup>c</sup> |
|-------------------------|------|--------------|---------------------|---------------------|--------------------|-----------------------------|--------------------|-----------------------------------|
| <b>SOS</b>              |      |              |                     |                     |                    |                             |                    |                                   |
| <b>Age, years</b>       |      |              |                     |                     |                    |                             |                    |                                   |
| 6-12                    | 2762 | 0(reference) | 0.10 (-0.03, 0.23)  | 0.07 (-0.06, 0.19)  | 0.17 (0.05, 0.30)  | 0.01                        | 0.06 (0.02, 0.10)  | <0.0001                           |
| 13-18                   | 1920 | 0(reference) | 0.11 (-0.02, 0.23)  | 0.35 (0.20, 0.49)   | 0.48 (0.31, 0.65)  | <0.0001                     | 0.19 (0.13, 0.25)  |                                   |
| <b>Gender</b>           |      |              |                     |                     |                    |                             |                    |                                   |
| Male                    | 2587 | 0(reference) | 0.07 (-0.05, 0.19)  | 0.22 (0.10, 0.33)   | 0.26 (0.14, 0.38)  | <0.0001                     | 0.11 (0.06, 0.15)  | 0.2117                            |
| Female                  | 2095 | 0(reference) | 0.16 (0.03, 0.30)   | 0.15 (0.01, 0.30)   | 0.31 (0.15, 0.47)  | 0.0003                      | 0.10 (0.05, 0.16)  |                                   |
| <b>Stage of puberty</b> |      |              |                     |                     |                    |                             |                    |                                   |
| Pre-puberty             | 1454 | 0(reference) | -0.11 (-0.33, 0.11) | -0.10 (-0.31, 0.11) | 0.03 (-0.17, 0.23) | 0.0916                      | 0.05 (-0.01, 0.11) | 0.0004                            |
| Mid-puberty             | 1029 | 0(reference) | 0.00 (-0.19, 0.20)  | 0.06 (-0.13, 0.25)  | 0.04 (-0.16, 0.24) | 0.5669                      | 0.02 (-0.05, 0.10) |                                   |
| Post-puberty            | 2199 | 0(reference) | 0.17 (0.05, 0.28)   | 0.31 (0.18, 0.45)   | 0.48 (0.33, 0.64)  | <0.0001                     | 0.19 (0.13, 0.24)  |                                   |
| <b>Weight status</b>    |      |              |                     |                     |                    |                             |                    |                                   |
| Underweight             | 410  | 0(reference) | 0.06 (-0.28, 0.40)  | 0.20 (-0.14, 0.54)  | 0.40 (0.04, 0.76)  | 0.009                       | 0.17 (0.05, 0.29)  | 0.6250                            |
| Normal weight           | 3201 | 0(reference) | 0.09 (-0.01, 0.20)  | 0.18 (0.07, 0.30)   | 0.29 (0.18, 0.41)  | <0.0001                     | 0.11 (0.07, 0.15)  |                                   |
| Overweight/obesity      | 1071 | 0(reference) | 0.28 (0.10, 0.46)   | 0.27 (0.08, 0.45)   | 0.31 (0.11, 0.52)  | 0.0081                      | 0.12 (0.05, 0.19)  |                                   |

<sup>a</sup> Generalized linear models were used. Model adjusted age, gender, paternal education levels, maternal education levels, household income, pubertal development stages, weight status, sedentary behaviour, nighttime sleep duration, nap duration, levels of MVPA, drinking status, smoking status, vitamin D supplement, calcium supplement, and multivitamin mineral supplement.

<sup>b</sup> *P* value for trend was test by using the median value with each quartile.

<sup>c</sup> *P* value for interaction was test by using log likelihood ratio test.

**Supplemental Table 3. Association between serum vitamin D status <sup>a</sup> and SOS (SOS Z score) <sup>b</sup>.**

|                    | <b>Deficiency</b> | <b>Insufficiency</b> | <b>Sufficiency</b> | <b><i>P</i> trend <sup>c</sup></b> |
|--------------------|-------------------|----------------------|--------------------|------------------------------------|
| <b>N (%)</b>       | 668 (14.3%)       | 1258 (26.9%)         | 2756 (58.9%)       |                                    |
| <b>SOS</b>         |                   |                      |                    |                                    |
| Model 1            | 0(reference)      | 3.88 (0.72, 7.03)    | 7.43 (4.35, 10.50) | <0.0001                            |
| Model 2            | 0(reference)      | 3.58 (0.43, 6.74)    | 7.61 (4.51, 10.70) | <0.0001                            |
| <b>SOS Z score</b> |                   |                      |                    |                                    |
| Model 1            | 0(reference)      | 0.14 (0.04, 0.24)    | 0.26 (0.16, 0.36)  | <0.0001                            |
| Model 2            | 0(reference)      | 0.12 (0.02, 0.22)    | 0.25 (0.15, 0.35)  | <0.0001                            |

<sup>a</sup> The definition of vitamin D status based on criteria 2: serum vitamin D  $\leq 15$  ng/ml, 15-20 ng/ml, >20 ng/ml were defined as deficiency, insufficiency, and sufficiency, respectively.

<sup>b</sup> Generalized linear model were used. Model adjusted age, gender, paternal education levels, maternal education levels, household income, pubertal development stages, weight status, sedentary behaviour, nighttime sleep duration, nap duration, levels of MVPA, drinking status, smoking status, vitamin D supplement, calcium supplement, and multivitamin mineral supplement.

<sup>c</sup> *P* value for trend was test by using the median value with each quartile.
